# Supplementary material for: Phosphorylated CPI-17 and MLC2 as Biomarkers of Coronary Artery Spasm–Induced Sudden Cardiac Death
Source: MDPI journal article supplement (doi:10.3390/ijms25052941), 2024-03-03
Supplement: s1 [file s1]

## Supplementary Material

### Supplementary Figure

#### Supplementary Figure S1

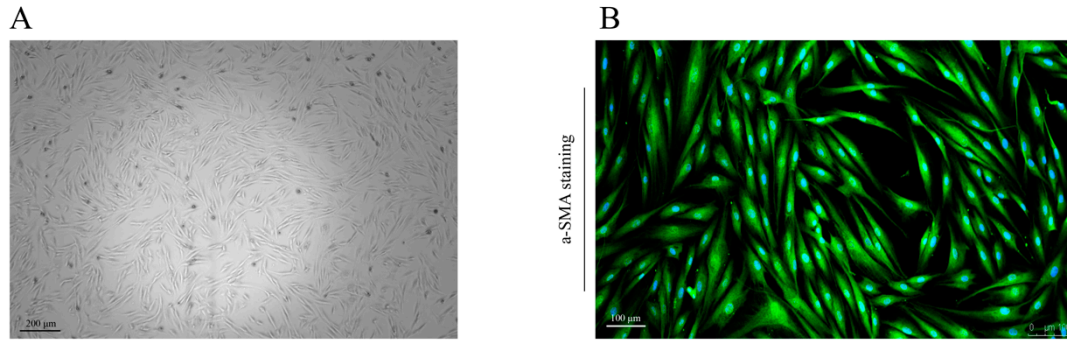

**Supplementary Figure S1.** Morphological characteristics and identification of hCASCs. (A) The morphological characteristics of hCASCs. Scale bar: 200 μm. (B) Expression of α-SMA in hCASCs was detected by immunofluorescence staining. Scale bar: 100 μm.

#### Supplementary Figure S2

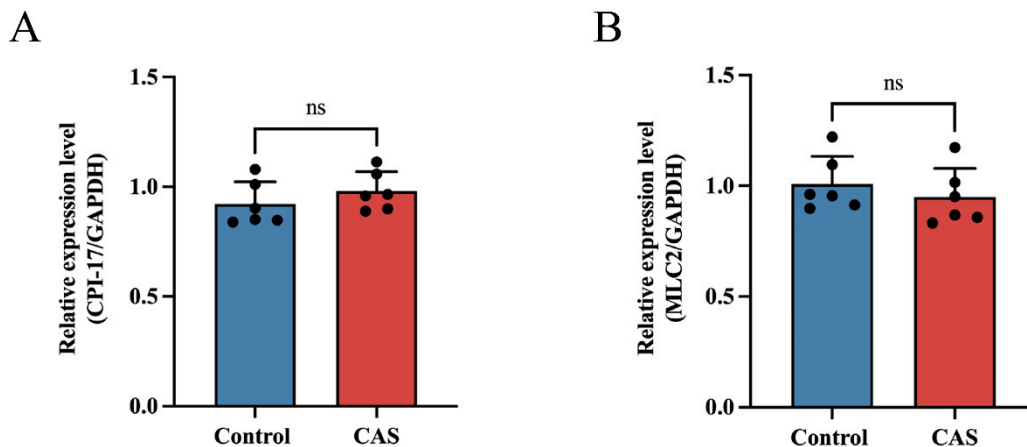

**Supplementary Figure S2.** The expression of CPI-17 and MLC2 protein levels in CAS rat coronary arteries. (A) Results were expressed as a grayscale ratio of CPI-17 / GAPDH.  $n = 6$  per group. (B) Results were expressed as a grayscale ratio of MLC2 / GAPDH.  $n = 6$  per group. Data presented as mean  $\pm$  SEM. ns, no significance.

## Supplementary Table

**Supplementary Table S1.** Autopsy information for collected human left-anterior descending-artery samples.

| Case No. | Category | Age (y) | Gender | Circumstances of death                                 | PMI, days | Gross finding          | Histological examination      |
|----------|----------|---------|--------|--------------------------------------------------------|-----------|------------------------|-------------------------------|
| 1        | Control  | 44      | M      | Hemorrhagic shock due to road traffic accident         | 2         | Mild LADA stenosis     | Mild LADA atherosclerosis     |
| 2        | Control  | 40      | F      | Basilar-artery rupture                                 | 4         | Mild LADA stenosis     | Mild LADA atherosclerosis     |
| 3        | Control  | 55      | M      | Fall from height                                       | 2         | Moderate LADA stenosis | Moderate LADA atherosclerosis |
| 4        | CAS      | 51      | M      | Quarrel and emotional agitation                        | 2         | Mild LADA stenosis     | Mild LADA atherosclerosis     |
| 5        | CAS      | 48      | M      | Quarrel and emotional agitation                        | 2         | Mild LADA stenosis     | Mild LADA atherosclerosis     |
| 6        | CAS      | 55      | F      | Fight resulting in minimal trauma; emotional agitation | 5         | Moderate LADA stenosis | Moderate LADA atherosclerosis |

CAS, coronary-artery spasm; M, male; F, female; PMI, postmortem interval; LADA, left-anterior descending artery.
